# Supplementary material for: Clinical Validity of Circulating Tumor DNA as Prognostic and Predictive Marker for Personalized Colorectal Cancer Patient Management
Source: Cancers (Basel). 2022 Feb 8;14(3):851. doi: 10.3390/cancers14030851 (PMC8834623; doi:10.3390/cancers14030851)
Supplement: Supplementary file 1 [file cancers-14-00851-s001.zip › Suppl_Tables_2+3.xlsx]

## Sheet: Supplementary Table 2
Supplementary Table 2: Data of all samples collected from study participants
SampleID	LB_Nr	Sex	Age	UICC	UICC_Add	Course	Therapy_S	Therapy_C	Days	Day_S	Day_C	Day_C_2	Day_C_3	Day_C_4	Day_pal_C	Day_Rez	Day_Rez_Surg	Day_Rez_2	Day_PR	Day_SD	Day_PD	Day_PD_2	Day_PD_3	Day_Rad	Day_Stop_C	Death	Gene	SNV	LOB	LOD	LOQ	TE_LOQ	TE_LOQ_10	TE_10_100	Fract_Ab	Plasma_Vol_ml	DNA_per_ml_Frag_Anal	BC_Fract_Ab	Material	CEA	Smoking	Disease	Analysis
LB-CRC-02-P-01	LB-CRC-02	m	76	IV		before	NA	Chemo	-3	NA	0	NA	NA	NA	185	NA	NA	NA	81	NA	171	NA	NA	NA	NA	544	KRAS	p.G13D	0.11	0.26	0.41	0.4627	0.2621	0.1089	37.5	8	NA	0.026	P	NA	non-smoker	CRC	ddPCR
LB-CRC-02-P-02	LB-CRC-02	m	76	IV		during	NA	Chemo	32	NA	0	NA	NA	NA	185	NA	NA	NA	81	NA	171	NA	NA	NA	NA	544	KRAS	p.G13D	0.11	0.26	0.41	0.4627	0.2621	0.1089	1.6	2.5	NA	0.0800324	P	NA	non-smoker	CRC	ddPCR
LB-CRC-02-P-03	LB-CRC-02	m	76	IV		during	NA	Chemo	46	NA	0	NA	NA	NA	185	NA	NA	NA	81	NA	171	NA	NA	NA	NA	544	KRAS	p.G13D	0.11	0.26	0.41	0.4627	0.2621	0.1089	0.47	2.5	NA	0.026	P	NA	non-smoker	CRC	ddPCR
LB-CRC-02-P-04	LB-CRC-02	m	76	IV		during	NA	Chemo	76	NA	0	NA	NA	NA	185	NA	NA	NA	81	NA	171	NA	NA	NA	NA	544	KRAS	p.G13D	0.11	0.26	0.41	0.4627	0.2621	0.1089	0.82	8	NA	0.09	P	NA	non-smoker	CRC	ddPCR
LB-CRC-02-P-05	LB-CRC-02	m	76	IV		during	NA	Chemo	228	NA	0	NA	NA	NA	185	NA	NA	NA	81	NA	171	NA	NA	NA	NA	544	KRAS	p.G13D	0.11	0.26	0.41	0.4627	0.2621	0.1089	0.72	31.35	55.96	0.03	P	25	non-smoker	CRC	ddPCR
LB-CRC-02-P-06	LB-CRC-02	m	76	IV		during	NA	Chemo	237	NA	0	NA	NA	NA	185	NA	NA	NA	81	NA	171	NA	NA	NA	NA	544	KRAS	p.G13D	0.11	0.26	0.41	0.4627	0.2621	0.1089	0.93	4.5	58.7333	0.05	P	25.7393	non-smoker	CRC	ddPCR
LB-CRC-02-P-07	LB-CRC-02	m	76	IV		during	NA	Chemo	356	NA	0	NA	NA	NA	185	NA	NA	NA	81	NA	171	NA	NA	NA	NA	544	KRAS	p.G13D	0.11	0.26	0.41	0.4627	0.2621	0.1089	18.61	7.5	41.21	0.09	P	25	non-smoker	CRC	ddPCR
LB-CRC-02-P-08	LB-CRC-02	m	76	IV		during	NA	Chemo	411	NA	0	NA	NA	NA	185	NA	NA	NA	81	NA	171	NA	NA	NA	NA	544	KRAS	SNVs	0.11	0.26	0.41	0.4627	0.2621	0.1089	10.55	7.5	49	0.0335709	P	25	non-smoker	CRC	ddPCR
LB-CRC-02-P-09	LB-CRC-02	m	76	IV		during	NA	Chemo	509	NA	0	NA	NA	NA	185	NA	NA	NA	81	NA	171	NA	NA	NA	NA	544	KRAS	SNVs	0.11	0.26	0.41	0.4627	0.2621	0.1089	32.8467	7.5	67.2572	0	P	25	non-smoker	CRC	ddPCR
LB-CRC-03-P-01	LB-CRC-03	w	61	II	A	before	Surgery	NA	-1	0	19	NA	NA	NA	NA	NA	NA	NA	NA	NA	NA	NA	NA	NA	NA	NA	KRAS	p.G12D	0.11	0.26	0.41	0.4627	0.2621	0.1089	0.36	5.95	8.72	0.02	P	1.41153	NA	CRC	ddPCR
LB-CRC-03-P-02	LB-CRC-03	w	61	II	A	after	Surgery	NA	6	0	19	NA	NA	NA	NA	NA	NA	NA	NA	NA	NA	NA	NA	NA	NA	NA	KRAS	p.G12D	0.11	0.26	0.41	0.4627	0.2621	0.1089	0.03	7.51	10.76	0	P	1.21795	NA	CRC	ddPCR
LB-CRC-05-P-01	LB-CRC-05	m	80	II	A	before	Surgery	NA	-1	0	NA	NA	NA	NA	NA	NA	NA	NA	NA	NA	NA	NA	NA	NA	NA	NA	BRAF	p.V600E	0.02	0.4	0.52	0.5236	0.3632	0.1489	0	7.5	113.3	0.01	P	1.14623	non-smoker	CRC	ddPCR
LB-CRC-05-P-02	LB-CRC-05	m	80	II	A	after	Surgery	NA	6	0	NA	NA	NA	NA	NA	NA	NA	NA	NA	NA	NA	NA	NA	NA	NA	NA	BRAF	p.V600E	0.02	0.4	0.52	0.5236	0.3632	0.1489	0	7.5	160	0	P	1.32194	non-smoker	CRC	ddPCR
LB-CRC-05-P-03	LB-CRC-05	m	80	II	A	after	Surgery	NA	39	0	NA	NA	NA	NA	NA	NA	NA	NA	NA	NA	NA	NA	NA	NA	NA	NA	BRAF	p.V600E	0.02	0.4	0.52	0.5236	0.3632	0.1489	0	7.5	23.6	0	P	1.30695	non-smoker	CRC	ddPCR
LB-CRC-05-P-04	LB-CRC-05	m	80	II	A	after	Surgery	NA	180	0	NA	NA	NA	NA	NA	NA	NA	NA	NA	NA	NA	NA	NA	NA	NA	NA	BRAF	p.V600E	0.02	0.4	0.52	0.5236	0.3632	0.1489	0	4.5	12.3	0	P	1.30829	non-smoker	CRC	ddPCR
LB-CRC-05-P-05	LB-CRC-05	m	80	II	A	after	Surgery	NA	290	0	NA	NA	NA	NA	NA	NA	NA	NA	NA	NA	NA	NA	NA	NA	NA	NA	BRAF	p.V600E	0.02	0.4	0.52	0.5236	0.3632	0.1489	0	5.5	9.83	NA	P	1.75973	non-smoker	CRC	ddPCR
LB-CRC-05-P-06	LB-CRC-05	m	80	II	A	after	Surgery	NA	710	0	NA	NA	NA	NA	NA	NA	NA	NA	NA	NA	NA	NA	NA	NA	NA	NA	BRAF	p.V600E	0.02	0.4	0.52	0.5236	0.3632	0.1489	0	7	9.66086	NA	P	0.819627	non-smoker	CRC	ddPCR
LB-CRC-05-T-01	LB-CRC-05	m		II	A	NA	Surgery	NA	NA	0	NA	NA	NA	NA	NA	NA	NA	NA	NA	NA	NA	NA	NA	NA	NA	NA	BRAF	p.V600E	0.02	0.4	0.52	0.5236	0.3632	0.1489	9.91	NA	NA	NA	R	NA	non-smoker	CRC	ddPCR
LB-CRC-06-P-01	LB-CRC-06	m	70	II	A	before	Surgery	NA	-1	0	NA	NA	NA	NA	NA	NA	NA	NA	NA	NA	NA	NA	NA	NA	NA	NA	BRAF	p.V600E	0.02	0.4	0.52	0.5236	0.3632	0.1489	1.05	6	18.4	0	P	1.42301	former smoker	CRC	ddPCR
LB-CRC-06-P-02	LB-CRC-06	m	70	II	A	after	Surgery	NA	4	0	NA	NA	NA	NA	NA	NA	NA	NA	NA	NA	NA	NA	NA	NA	NA	NA	BRAF	p.V600E	0.02	0.4	0.52	0.5236	0.3632	0.1489	0	4.5	19.5	NA	P	0.849188	former smoker	CRC	ddPCR
LB-CRC-06-P-03	LB-CRC-06	m	70	II	A	after	Surgery	NA	38	0	NA	NA	NA	NA	NA	NA	NA	NA	NA	NA	NA	NA	NA	NA	NA	NA	BRAF	p.V600E	0.02	0.4	0.52	0.5236	0.3632	0.1489	0	7.5	10.2	0	P	1.1216	former smoker	CRC	ddPCR
LB-CRC-06-P-04	LB-CRC-06	m	70	II	A	after	Surgery	NA	171	0	NA	NA	NA	NA	NA	NA	NA	NA	NA	NA	NA	NA	NA	NA	NA	NA	BRAF	p.V600E	0.02	0.4	0.52	0.5236	0.3632	0.1489	0	5	5.5	0	P	1.22403	former smoker	CRC	ddPCR
LB-CRC-06-P-05	LB-CRC-06	m	70	II	A	after	Surgery	NA	265	0	NA	NA	NA	NA	NA	NA	NA	NA	NA	NA	NA	NA	NA	NA	NA	NA	BRAF	p.V600E	0.02	0.4	0.52	0.5236	0.3632	0.1489	0	6.5	7.09	NA	P	1.40859	former smoker	CRC	ddPCR
LB-CRC-06-P-06	LB-CRC-06	m	70	II	A	after	Surgery	NA	347	0	NA	NA	NA	NA	NA	NA	NA	NA	NA	NA	NA	NA	NA	NA	NA	NA	BRAF	p.V600E	0.02	0.4	0.52	0.5236	0.3632	0.1489	0	4	16.81	NA	P	1.39908	former smoker	CRC	ddPCR
LB-CRC-06-P-07	LB-CRC-06	m	70	II	A	after	Surgery	NA	752	0	NA	NA	NA	NA	NA	NA	NA	NA	NA	NA	NA	NA	NA	NA	NA	NA	BRAF	p.V600E	0.02	0.4	0.52	0.5236	0.3632	0.1489	0	3.5	23.916	NA	P	0.510344	former smoker	CRC	ddPCR
LB-CRC-06-T-01	LB-CRC-06	m		II	A	NA	Surgery	NA	NA	0	NA	NA	NA	NA	NA	NA	NA	NA	NA	NA	NA	NA	NA	NA	NA	NA	BRAF	p.V600E	0.02	0.4	0.52	0.5236	0.3632	0.1489	20.52	NA	NA	NA	R	NA	former smoker	CRC	ddPCR
LB-CRC-07-P-01	LB-CRC-07	w	69	II	A	before	Surgery	Chemo	-3	0	454	NA	NA	NA	NA	214	228	440	501	624	NA	NA	NA	NA	NA	NA	BRAF	p.V600E	0.02	0.4	0.52	0.5236	0.3632	0.1489	0	6	2.9	0	P	1.31533	former smoker	CRC	ddPCR
LB-CRC-07-P-02	LB-CRC-07	w	69	II	A	after	Surgery	Chemo	3	0	454	NA	NA	NA	NA	214	228	440	501	624	NA	NA	NA	NA	NA	NA	BRAF	p.V600E	0.02	0.4	0.52	0.5236	0.3632	0.1489	0	NA	13	0	P	1.23028	former smoker	CRC	ddPCR
LB-CRC-07-P-03	LB-CRC-07	w	69	II	A	after	Surgery	Chemo	43	0	454	NA	NA	NA	NA	214	228	440	501	624	NA	NA	NA	NA	NA	NA	BRAF	p.V600E	0.02	0.4	0.52	0.5236	0.3632	0.1489	0	7.5	3.4	0	P	0.962225	former smoker	CRC	ddPCR
LB-CRC-07-P-04	LB-CRC-07	w	69	II	A	after	Surgery	Chemo	227	0	454	NA	NA	NA	NA	214	228	440	501	624	NA	NA	NA	NA	NA	NA	BRAF	p.V600E	0.02	0.4	0.52	0.5236	0.3632	0.1489	0.53	5	3.1	0	P	1.51556	former smoker	CRC	ddPCR
LB-CRC-07-P-05	LB-CRC-07	w	69	II	A	after	Surgery	Chemo	240	0	454	NA	NA	NA	NA	214	228	440	501	624	NA	NA	NA	NA	NA	NA	BRAF	p.V600E	0.02	0.4	0.52	0.5236	0.3632	0.1489	0.01	7.5	23.67	NA	P	1.93597	former smoker	CRC	ddPCR
LB-CRC-07-P-06	LB-CRC-07	w	69	II	A	after	Surgery	Chemo	303	0	454	NA	NA	NA	NA	214	228	440	501	624	NA	NA	NA	NA	NA	NA	BRAF	p.V600E	0.02	0.4	0.52	0.5236	0.3632	0.1489	0.06	7	4.51	0	P	1.8141	former smoker	CRC	ddPCR
LB-CRC-07-P-07	LB-CRC-07	w	69	II	A	after	Surgery	Chemo	364	0	454	NA	NA	NA	NA	214	228	440	501	624	NA	NA	NA	NA	NA	NA	BRAF	p.V600E	0.02	0.4	0.52	0.5236	0.3632	0.1489	0.82	5	4.28	0	P	1.71611	former smoker	CRC	ddPCR
LB-CRC-07-P-08	LB-CRC-07	w	69	II	A	after	Surgery	Chemo	584	0	454	NA	NA	NA	NA	214	228	440	501	624	NA	NA	NA	NA	NA	NA	BRAF	p.V600E	0.02	0.4	0.52	0.5236	0.3632	0.1489	0.0637417	4	51.29	0	P	1.30567	former smoker	CRC	ddPCR
LB-CRC-07-P-09	LB-CRC-07	w	69	II	A	after	Surgery	Chemo	616	0	454	NA	NA	NA	NA	214	228	440	501	624	NA	NA	NA	NA	NA	NA	BRAF	p.V600E	0.02	0.4	0.52	0.5236	0.3632	0.1489	0.0152522	6.5	14.42	NA	P	0.69556	former smoker	CRC	ddPCR
LB-CRC-07-P-10	LB-CRC-07	w	69	II	A	after	Surgery	Chemo	644	0	454	NA	NA	NA	NA	214	228	440	501	624	NA	NA	NA	NA	NA	NA	BRAF	p.V600E	0.02	0.4	0.52	0.5236	0.3632	0.1489	0	4.5	26.92	NA	P	0.791642	former smoker	CRC	ddPCR
LB-CRC-07-P-11	LB-CRC-07	w	69	II	A	after	Surgery	Chemo	672	0	454	NA	NA	NA	NA	214	228	440	501	624	NA	NA	NA	NA	NA	NA	BRAF	p.V600E	0.02	0.4	0.52	0.5236	0.3632	0.1489	0	3.5	25.91	NA	P	0.881381	former smoker	CRC	ddPCR
LB-CRC-07-P-12	LB-CRC-07	w	69	II	A	after	Surgery	Chemo	696	0	454	NA	NA	NA	NA	214	228	440	501	624	NA	NA	NA	NA	NA	NA	BRAF	p.V600E	0.02	0.4	0.52	0.5236	0.3632	0.1489	0	7.5	129.663	NA	P	0.634671	former smoker	CRC	ddPCR
LB-CRC-07-P-13	LB-CRC-07	w	69	II	A	after	Surgery	Chemo	704	0	454	NA	NA	NA	NA	214	228	440	501	624	NA	NA	NA	NA	NA	NA	BRAF	p.V600E	0.02	0.4	0.52	0.5236	0.3632	0.1489	0	7.5	171.264	NA	P	0.760539	former smoker	CRC	ddPCR
LB-CRC-07-P-14	LB-CRC-07	w	69	II	A	after	Surgery	Chemo	758	0	454	NA	NA	NA	NA	214	228	440	501	624	NA	NA	NA	NA	NA	NA	BRAF	p.V600E	0.02	0.4	0.52	0.5236	0.3632	0.1489	0.01	6.5	57.7149	NA	P	0.821055	former smoker	CRC	ddPCR
LB-CRC-07-P-15	LB-CRC-07	w	69	II	A	after	Surgery	Chemo	822	0	454	NA	NA	NA	NA	NA	NA	NA	NA	NA	NA	NA	NA	NA	NA	NA	BRAF	p.V600E	0.02	0.4	0.52	0.5236	0.3632	0.1489	0	7.5	16.2348	NA	P	0.294011	former smoker	CRC	ddPCR
LB-CRC-07-T-01	LB-CRC-07	w		II	A	NA	Surgery	Chemo	NA	0	454	NA	NA	NA	NA	214	228	440	501	624	NA	NA	NA	NA	NA	NA	BRAF	p.V600E	0.02	0.4	0.52	0.5236	0.3632	0.1489	9.54	NA	NA	NA	R	NA	former smoker	CRC	ddPCR
LB-CRC-08-P-01	LB-CRC-08	m	39	IV	C	before	Surgery	Chemo	-1	0	71	104	165	189	NA	NA	NA	NA	NA	NA	104	134	195	NA	NA	386	NA	NA	NA	NA	NA	NA	NA	NA	NA	7.5	22.4112	NA	P	NA	NA	CRC	cfDNA_conc
LB-CRC-09-P-01	LB-CRC-09	w	87	IV	A	before	Surgery	NA	0	0	NA	NA	NA	NA	NA	NA	NA	NA	NA	NA	NA	NA	NA	NA	NA	NA	KRAS	SNVs	0.11	0.26	0.41	0.4627	0.2621	0.1089	17.5	7.5	6.16	0	P	16.5734	NA	CRC	ddPCR
LB-CRC-09-P-02	LB-CRC-09	w	87	IV	A	during	Surgery	NA	15	0	NA	NA	NA	NA	NA	NA	NA	NA	NA	NA	NA	NA	NA	NA	NA	NA	KRAS	SNVs	0.11	0.26	0.41	0.4627	0.2621	0.1089	3.79	7.5	34.8	0.08	P	25.0258	NA	CRC	ddPCR
LB-CRC-09-T-01	LB-CRC-09	w		IV	A	NA	Surgery	NA	NA	0	NA	NA	NA	NA	NA	NA	NA	NA	NA	NA	NA	NA	NA	NA	NA	NA	KRAS	SNVs	0.11	0.26	0.41	0.4627	0.2621	0.1089	24.99	NA	NA	24.99	R	NA	NA	CRC	ddPCR
LB-CRC-10-P-01	LB-CRC-10	m	66	II	A	before	Surgery	NA	-2	0	NA	NA	NA	NA	NA	NA	NA	NA	NA	NA	NA	NA	NA	NA	NA	NA	KRAS	SNVs	0.11	0.26	0.41	0.4627	0.2621	0.1089	0.34	7.5	3.68	0	P	0.9013	non-smoker	CRC	ddPCR
LB-CRC-10-P-02	LB-CRC-10	m	66	II	A	after	Surgery	NA	11	0	NA	NA	NA	NA	NA	NA	NA	NA	NA	NA	NA	NA	NA	NA	NA	NA	KRAS	SNVs	0.11	0.26	0.41	0.4627	0.2621	0.1089	0.04	7.5	18.76	0.07	P	1.12204	non-smoker	CRC	ddPCR
LB-CRC-10-P-03	LB-CRC-10	m	66	II	A	after	Surgery	NA	50	0	NA	NA	NA	NA	NA	NA	NA	NA	NA	NA	NA	NA	NA	NA	NA	NA	KRAS	SNVs	0.11	0.26	0.41	0.4627	0.2621	0.1089	0.06	4.5	19.1333	NA	P	1.36515	non-smoker	CRC	ddPCR
LB-CRC-10-P-04	LB-CRC-10	m	66	II	A	after	Surgery	NA	216	0	NA	NA	NA	NA	NA	NA	NA	NA	NA	NA	NA	NA	NA	NA	NA	NA	KRAS	SNVs	0.11	0.26	0.41	0.4627	0.2621	0.1089	0.12	2	3.13	0.0455542	P	0.852783	non-smoker	CRC	ddPCR
LB-CRC-10-P-05	LB-CRC-10	m	66	II	A	after	Surgery	NA	335	0	NA	NA	NA	NA	NA	NA	NA	NA	NA	NA	NA	NA	NA	NA	NA	NA	KRAS	SNVs	0.11	0.26	0.41	0.4627	0.2621	0.1089	0.116556	3	4.649	0.04	P	0.81843	non-smoker	CRC	ddPCR
LB-CRC-10-T-01	LB-CRC-10	m	87	II	A	NA	Surgery	NA	NA	0	NA	NA	NA	NA	NA	NA	NA	NA	NA	NA	NA	NA	NA	NA	NA	NA	KRAS	SNVs	0.11	0.26	0.41	0.4627	0.2621	0.1089	10.95	NA	NA	10.95	R	NA	non-smoker	CRC	ddPCR
LB-CRC-11-P-01	LB-CRC-11	w	85	II	B	before	Surgery	NA	-1	0	NA	NA	NA	NA	NA	NA	NA	NA	NA	NA	NA	NA	NA	NA	NA	NA	BRAF	p.V600E	0.02	0.4	0.52	0.5236	0.3632	0.1489	0	7.5	5.4	0	P	1.22059	non-smoker	CRC	ddPCR
LB-CRC-11-P-02	LB-CRC-11	w	85	II	B	after	Surgery	NA	7	0	NA	NA	NA	NA	NA	NA	NA	NA	NA	NA	NA	NA	NA	NA	NA	NA	BRAF	p.V600E	0.02	0.4	0.52	0.5236	0.3632	0.1489	0	7.5	23.7	0	P	1.08645	non-smoker	CRC	ddPCR
LB-CRC-11-P-03	LB-CRC-11	w	85	II	B	after	Surgery	NA	118	0	NA	NA	NA	NA	NA	NA	NA	NA	NA	NA	NA	NA	NA	NA	NA	NA	BRAF	p.V600E	0.02	0.4	0.52	0.5236	0.3632	0.1489	0	7.5	9.6	0	P	1.48594	non-smoker	CRC	ddPCR
LB-CRC-11-T-01	LB-CRC-11	w		II	B	NA	Surgery	NA	NA	0	NA	NA	NA	NA	NA	NA	NA	NA	NA	NA	NA	NA	NA	NA	NA	NA	BRAF	p.V600E	0.02	0.4	0.52	0.5236	0.3632	0.1489	23.88	NA	NA	NA	R	NA	non-smoker	CRC	ddPCR
LB-CRC-12-P-02	LB-CRC-12	m		IV	NA	before	NA	Chemo	-1	0	NA	NA	NA	NA	NA	NA	NA	NA	NA	NA	131	NA	NA	NA	NA	NA	NA	NA	NA	NA	NA	NA	NA	NA	NA	5.5	12.6545	NA	P	NA	NA	CRC	cfDNA_conc
LB-CRC-12-P-03	LB-CRC-12	m		IV	NA	during	NA	Chemo	4	0	NA	NA	NA	NA	NA	NA	NA	NA	NA	NA	131	NA	NA	NA	NA	NA	NA	NA	NA	NA	NA	NA	NA	NA	NA	7.5	66.12	NA	P	NA	NA	CRC	cfDNA_conc
LB-CRC-14-P-01	LB-CRC-14	w	73	I		before	Surgery	NA	-1	0	NA	NA	NA	NA	NA	NA	NA	NA	NA	NA	NA	NA	NA	NA	NA	NA	BRAF	p.V600E	0.02	0.4	0.52	0.5236	0.3632	0.1489	0	6.5	5.41	NA	P	1.86364	non-smoker	CRC	ddPCR
LB-CRC-14-P-02	LB-CRC-14	w	73	I		after	Surgery	NA	5	0	NA	NA	NA	NA	NA	NA	NA	NA	NA	NA	NA	NA	NA	NA	NA	NA	BRAF	p.V600E	0.02	0.4	0.52	0.5236	0.3632	0.1489	0	6	13.45	NA	P	1.43387	non-smoker	CRC	ddPCR
LB-CRC-14-P-03	LB-CRC-14	w	73	I		after	Surgery	NA	38	0	NA	NA	NA	NA	NA	NA	NA	NA	NA	NA	NA	NA	NA	NA	NA	NA	BRAF	p.V600E	0.02	0.4	0.52	0.5236	0.3632	0.1489	0	6	21.73	NA	P	2.21213	non-smoker	CRC	ddPCR
LB-CRC-14-P-04	LB-CRC-14	w	73	I		after	Surgery	NA	188	0	NA	NA	NA	NA	NA	NA	NA	NA	NA	NA	NA	NA	NA	NA	NA	NA	BRAF	p.V600E	0.02	0.4	0.52	0.5236	0.3632	0.1489	0	5	8.71	NA	P	1.96736	non-smoker	CRC	ddPCR
LB-CRC-14-P-05	LB-CRC-14	w	73	I		after	Surgery	NA	356	0	NA	NA	NA	NA	NA	NA	NA	NA	NA	NA	NA	NA	NA	NA	NA	NA	BRAF	p.V600E	0.02	0.4	0.52	0.5236	0.3632	0.1489	0	7	4.07	NA	P	1.12251	non-smoker	CRC	ddPCR
LB-CRC-14-T-01	LB-CRC-14	w		I		NA	Surgery	NA	NA	0	NA	NA	NA	NA	NA	NA	NA	NA	NA	NA	NA	NA	NA	NA	NA	NA	BRAF	p.V600E	0.02	0.4	0.52	0.5236	0.3632	0.1489	19.09	NA	NA	NA	R	NA	non-smoker	CRC	ddPCR
LB-CRC-14-T-02	LB-CRC-14	w		I		NA	Surgery	NA	NA	0	NA	NA	NA	NA	NA	NA	NA	NA	NA	NA	NA	NA	NA	NA	NA	NA	BRAF	p.V600E	0.02	0.4	0.52	0.5236	0.3632	0.1489	16.28	NA	NA	NA	R	NA	non-smoker	CRC	ddPCR
LB-CRC-18-P-01	LB-CRC-18	m	75	III	B	before	Surgery	Chemo	-1	0	82	NA	NA	NA	NA	NA	NA	NA	NA	NA	NA	NA	NA	NA	NA	NA	KRAS	SNVs	0.11	0.26	0.41	0.4627	0.2621	0.1089	0.05	7.5	8.96	NA	P	2.41277	non-smoker	CRC	ddPCR
LB-CRC-18-P-02	LB-CRC-18	m	75	III	B	after	Surgery	Chemo	5	0	82	NA	NA	NA	NA	NA	NA	NA	NA	NA	NA	NA	NA	NA	NA	NA	KRAS	SNVs	0.11	0.26	0.41	0.4627	0.2621	0.1089	0.07	7.5	29.96	NA	P	1.69505	non-smoker	CRC	ddPCR
LB-CRC-18-P-03	LB-CRC-18	m	75	III	B	after	Surgery	Chemo	25	0	82	NA	NA	NA	NA	NA	NA	NA	NA	NA	NA	NA	NA	NA	NA	NA	KRAS	SNVs	0.11	0.26	0.41	0.4627	0.2621	0.1089	0.03	7.5	13.55	NA	P	1.68932	non-smoker	CRC	ddPCR
LB-CRC-18-P-04	LB-CRC-18	m	75	III	B	after	Surgery	Chemo	186	0	82	NA	NA	NA	NA	NA	NA	NA	NA	NA	NA	NA	NA	NA	NA	NA	KRAS	SNVs	0.11	0.26	0.41	0.4627	0.2621	0.1089	0.106711	7	7.34	NA	P	0.986314	non-smoker	CRC	ddPCR
LB-CRC-18-P-05	LB-CRC-18	m	75	III	B	after	Surgery	Chemo	356	0	82	NA	NA	NA	NA	NA	NA	NA	NA	NA	NA	NA	NA	NA	NA	NA	KRAS	SNVs	0.11	0.26	0.41	0.4627	0.2621	0.1089	0.0774363	5.5	1.3431	NA	P	0.965187	non-smoker	CRC	ddPCR
LB-CRC-18-T-01	LB-CRC-18	m		III	B	NA	Surgery	Chemo	NA	0	82	NA	NA	NA	NA	NA	NA	NA	NA	NA	NA	NA	NA	NA	NA	NA	KRAS	SNVs	0.11	0.26	0.41	0.4627	0.2621	0.1089	20.45	NA	NA	NA	R	NA	non-smoker	CRC	ddPCR
LB-CRC-19-P-01	LB-CRC-19	w	86	III		before	Surgery	NA	-5	0	NA	NA	NA	NA	NA	NA	NA	NA	NA	NA	NA	NA	NA	NA	NA	NA	BRAF	p.V600E	0.02	0.4	0.52	0.5236	0.3632	0.1489	0.18	6.5	110.29	0	P	1.58326	NA	CRC	ddPCR
LB-CRC-19-P-02	LB-CRC-19	w	86	III		after	Surgery	NA	7	0	NA	NA	NA	NA	NA	NA	NA	NA	NA	NA	NA	NA	NA	NA	NA	NA	BRAF	p.V600E	0.02	0.4	0.52	0.5236	0.3632	0.1489	0	7.5	208.62	NA	P	1.76526	NA	CRC	ddPCR
LB-CRC-19-T-01	LB-CRC-19	w		III		NA	Surgery	NA	NA	0	NA	NA	NA	NA	NA	NA	NA	NA	NA	NA	NA	NA	NA	NA	NA	NA	BRAF	p.V600E	0.02	0.4	0.52	0.5236	0.3632	0.1489	35.74	NA	NA	35.74	R	NA	NA	CRC	ddPCR
LB-CRC-21-P-01	LB-CRC-21	w	76	IV	NA	before	Surgery	Chemo	4	0	10	NA	NA	NA	NA	NA	NA	NA	NA	NA	NA	NA	NA	NA	NA	NA	NA	NA	NA	NA	NA	NA	NA	NA	NA	7.5	12.8604	NA	P	NA	NA	CRC	cfDNA_conc
LB-CRC-23-P-01	LB-CRC-23	w	65	I		before	Surgery	NA	-1	0	NA	NA	NA	NA	NA	NA	NA	NA	NA	NA	NA	NA	NA	NA	NA	NA	BRAF	p.V600E	0.02	0.4	0.52	0.5236	0.3632	0.1489	0	5.5	6.18491	NA	P	3.69854	smoker	CRC	ddPCR
LB-CRC-23-P-02	LB-CRC-23	w	65	I		after	Surgery	NA	5	0	NA	NA	NA	NA	NA	NA	NA	NA	NA	NA	NA	NA	NA	NA	NA	NA	BRAF	p.V600E	0.02	0.4	0.52	0.5236	0.3632	0.1489	0	6	36.827	NA	P	1.57899	smoker	CRC	ddPCR
LB-CRC-23-P-03	LB-CRC-23	w	65	I		after	Surgery	NA	33	0	NA	NA	NA	NA	NA	NA	NA	NA	NA	NA	NA	NA	NA	NA	NA	NA	BRAF	p.V600E	0.02	0.4	0.52	0.5236	0.3632	0.1489	0.0105902	7.5	15.0464	NA	P	3.32361	smoker	CRC	ddPCR
LB-CRC-23-P-04	LB-CRC-23	w	65	I		after	Surgery	NA	194	0	NA	NA	NA	NA	NA	NA	NA	NA	NA	NA	NA	NA	NA	NA	NA	NA	BRAF	p.V600E	0.02	0.4	0.52	0.5236	0.3632	0.1489	0.0104446	5.5	8.18	NA	P	2.90577	smoker	CRC	ddPCR
LB-CRC-23-P-05	LB-CRC-23	w	65	I		after	Surgery	NA	372	0	NA	NA	NA	NA	NA	NA	NA	NA	NA	NA	NA	NA	NA	NA	NA	NA	BRAF	p.V600E	0.02	0.4	0.52	0.5236	0.3632	0.1489	0	4	11.2215	NA	P	2.11428	smoker	CRC	ddPCR
LB-CRC-23-T-01	LB-CRC-23	w	86	I		NA	Surgery	NA	NA	0	NA	NA	NA	NA	NA	NA	NA	NA	NA	NA	NA	NA	NA	NA	NA	NA	BRAF	p.V600E	0.02	0.4	0.52	0.5236	0.3632	0.1489	17.43	NA	NA	NA	R	NA	smoker	CRC	ddPCR
LB-CRC-24-P-01	LB-CRC-24	m	86	I		before	Surgery	NA	-2	0	NA	NA	NA	NA	NA	NA	NA	NA	NA	NA	NA	NA	NA	NA	NA	NA	KRAS	SNVs	0.11	0.26	0.41	0.4627	0.2621	0.1089	0.0504891	7	19.0693	NA	P	2.48669	non-smoker	CRC	ddPCR
LB-CRC-24-P-02	LB-CRC-24	m	86	I		after	Surgery	NA	4	0	NA	NA	NA	NA	NA	NA	NA	NA	NA	NA	NA	NA	NA	NA	NA	NA	KRAS	SNVs	0.11	0.26	0.41	0.4627	0.2621	0.1089	0.111812	7.5	14.2096	0.101813	P	1.06202	non-smoker	CRC	ddPCR
LB-CRC-24-P-03	LB-CRC-24	m	86	I		after	Surgery	NA	35	0	NA	NA	NA	NA	NA	NA	NA	NA	NA	NA	NA	NA	NA	NA	NA	NA	KRAS	SNVs	0.11	0.26	0.41	0.4627	0.2621	0.1089	0.0988687	7.5	4.8524	NA	P	0.943237	non-smoker	CRC	ddPCR
LB-CRC-24-P-04	LB-CRC-24	m	86	I		after	Surgery	NA	357	0	NA	NA	NA	NA	NA	NA	NA	NA	NA	NA	NA	NA	NA	NA	NA	NA	KRAS	SNVs	0.11	0.26	0.41	0.4627	0.2621	0.1089	0.127158	7.5	6.2676	0	P	0.933794	non-smoker	CRC	ddPCR
LB-CRC-24-T-01	LB-CRC-24	m	86	I		NA	Surgery	NA	NA	0	NA	NA	NA	NA	NA	NA	NA	NA	NA	NA	NA	NA	NA	NA	NA	NA	KRAS	p.G13D	0.11	0.26	0.41	0.4627	0.2621	0.1089	18.56	NA	NA	NA	R	NA	non-smoker	CRC	ddPCR
LB-CRC-25-P-01	LB-CRC-25	m	77	III	B	before	Surgery	Chemo	-1	0	53	NA	NA	NA	NA	391	442	NA	NA	NA	NA	NA	NA	434	233	NA	KRAS	SNVs	0.11	0.26	0.41	0.4627	0.2621	0.1089	0.292397	3	7.191	0	P	5.34141	non-smoker	CRC	ddPCR
LB-CRC-25-P-02	LB-CRC-25	m	77	III	B	after	Surgery	Chemo	20	0	53	NA	NA	NA	NA	391	442	NA	NA	NA	NA	NA	NA	434	233	NA	KRAS	SNVs	0.11	0.26	0.41	0.4627	0.2621	0.1089	0.516158	7	12.4144	0.06	P	4.13291	non-smoker	CRC	ddPCR
LB-CRC-25-P-03	LB-CRC-25	m	77	III	B	after	Surgery	Chemo	54	0	53	NA	NA	NA	NA	391	442	NA	NA	NA	NA	NA	NA	434	233	NA	KRAS	SNVs	0.11	0.26	0.41	0.4627	0.2621	0.1089	1.72364	3	5.682	0.02	P	6.32566	non-smoker	CRC	ddPCR
LB-CRC-25-P-04	LB-CRC-25	m	77	III	B	after	Surgery	Chemo	173	0	53	NA	NA	NA	NA	391	442	NA	NA	NA	NA	NA	NA	434	233	NA	KRAS	SNVs	0.11	0.26	0.41	0.4627	0.2621	0.1089	0.122857	4.5	9.07533	0	P	1.1602	non-smoker	CRC	ddPCR
LB-CRC-25-P-05	LB-CRC-25	m	77	III	B	after	Surgery	Chemo	358	0	53	NA	NA	NA	NA	391	442	NA	NA	NA	NA	NA	NA	434	233	NA	KRAS	SNVs	0.11	0.26	0.41	0.4627	0.2621	0.1089	0.09	2	16.824	NA	P	1.74368	non-smoker	CRC	ddPCR
LB-CRC-25-T-01	LB-CRC-25	m	77	III	B	NA	Surgery	Chemo	NA	0	53	NA	NA	NA	NA	391	442	NA	NA	NA	NA	NA	NA	434	233	NA	KRAS	p.G13D	0.11	0.26	0.41	0.4627	0.2621	0.1089	20.79	NA	NA	NA	R	NA	non-smoker	CRC	ddPCR
LB-CRC-25-T-02	LB-CRC-25	m	77	III	B	NA	Surgery	Chemo	NA	0	53	NA	NA	NA	NA	391	442	NA	NA	NA	NA	NA	NA	434	233	NA	KRAS	p.G13D	0.11	0.26	0.41	0.4627	0.2621	0.1089	21.6746	NA	NA	NA	R	NA	non-smoker	CRC	ddPCR
LB-CRC-27-P-01	LB-CRC-27	m	48	IV	A	before	Surgery	Chemo	-1	0	9	NA	NA	NA	NA	NA	NA	NA	NA	NA	NA	NA	NA	NA	NA	NA	NA	NA	NA	NA	NA	NA	NA	NA	NA	7	27.0501	NA	P	NA	NA	CRC	cfDNA_conc
LB-CRC-29-P-01	LB-CRC-29	m	83	III	B	before	Surgery	Chemo	-2	0	19	NA	NA	NA	NA	NA	NA	NA	NA	NA	NA	NA	NA	NA	NA	NA	KRAS	SNVs	0.11	0.26	0.41	0.4627	0.2621	0.1089	0.115777	7	9.13	0	P	1.92214	non-smoker	CRC	ddPCR
LB-CRC-29-P-02	LB-CRC-29	m	83	III	B	during	Surgery	Chemo	7	0	19	NA	NA	NA	NA	NA	NA	NA	NA	NA	NA	NA	NA	NA	NA	NA	KRAS	SNVs	0.11	0.26	0.41	0.4627	0.2621	0.1089	0	6	6.99	NA	P	0.761975	non-smoker	CRC	ddPCR
LB-CRC-29-P-03	LB-CRC-29	m	83	III	B	during	Surgery	Chemo	29	0	19	NA	NA	NA	NA	NA	NA	NA	NA	NA	NA	NA	NA	NA	NA	NA	KRAS	SNVs	0.11	0.26	0.41	0.4627	0.2621	0.1089	0.0601753	6	2.15	NA	P	0.782445	non-smoker	CRC	ddPCR
LB-CRC-29-P-04	LB-CRC-29	m	83	III	B	during	Surgery	Chemo	61	0	19	NA	NA	NA	NA	NA	NA	NA	NA	NA	NA	NA	NA	NA	NA	NA	KRAS	SNVs	0.11	0.26	0.41	0.4627	0.2621	0.1089	0.076633	7.5	5.67	NA	P	0.818707	non-smoker	CRC	ddPCR
LB-CRC-29-P-05	LB-CRC-29	m	83	III	B	during	Surgery	Chemo	121	0	19	NA	NA	NA	NA	NA	NA	NA	NA	NA	NA	NA	NA	NA	NA	NA	KRAS	SNVs	0.11	0.26	0.41	0.4627	0.2621	0.1089	0.0728902	4	5.37	NA	P	1.08877	non-smoker	CRC	ddPCR
LB-CRC-29-P-06	LB-CRC-29	m	83	III	B	during	Surgery	Chemo	220	0	19	NA	NA	NA	NA	NA	NA	NA	NA	NA	NA	NA	NA	NA	NA	NA	KRAS	SNVs	0.11	0.26	0.41	0.4627	0.2621	0.1089	0.03	4	5.8605	NA	P	0.585517	non-smoker	CRC	ddPCR
LB-CRC-29-P-07	LB-CRC-29	m	83	III	B	during	Surgery	Chemo	325	0	19	NA	NA	NA	NA	NA	NA	NA	NA	NA	NA	NA	NA	NA	NA	NA	KRAS	SNVs	0.11	0.26	0.41	0.4627	0.2621	0.1089	0.0311397	3.5	8.46943	NA	P	0.404895	non-smoker	CRC	ddPCR
LB-CRC-29-T-01	LB-CRC-29	m	83	III	B	NA	Surgery	Chemo	NA	0	NA	NA	NA	NA	NA	NA	NA	NA	NA	NA	NA	NA	NA	NA	NA	NA	KRAS	SNVs	0.11	0.26	0.41	0.4627	0.2621	0.1089	20.1594	NA	NA	20.1594	R	NA	non-smoker	CRC	ddPCR
LB-CRC-30-P-01	LB-CRC-30	w	65	IV		before	NA	Chemo	-5	NA	0	NA	NA	NA	0	NA	NA	NA	NA	134	237	NA	NA	NA	232	NA	BRAF	p.V600E	0.02	0.4	0.52	0.5236	0.3632	0.1489	19.33	5.5	22.4035	0	P	25	former smoker	CRC	ddPCR
LB-CRC-30-P-02	LB-CRC-30	w	65	IV		during	NA	Chemo	30	NA	0	NA	NA	NA	0	NA	NA	NA	NA	134	237	NA	NA	NA	232	NA	BRAF	p.V600E	0.02	0.4	0.52	0.5236	0.3632	0.1489	2.04	7.5	21.2588	0	P	25	former smoker	CRC	ddPCR
LB-CRC-30-P-03	LB-CRC-30	w	65	IV		during	NA	Chemo	58	NA	0	NA	NA	NA	0	NA	NA	NA	NA	134	237	NA	NA	NA	232	NA	BRAF	p.V600E	0.02	0.4	0.52	0.5236	0.3632	0.1489	1.37	7.5	3.2628	0	P	34.5828	former smoker	CRC	ddPCR
LB-CRC-30-P-04	LB-CRC-30	w	65	IV		during	NA	Chemo	86	NA	0	NA	NA	NA	0	NA	NA	NA	NA	134	237	NA	NA	NA	232	NA	BRAF	p.V600E	0.02	0.4	0.52	0.5236	0.3632	0.1489	0.21	7.5	2.7312	0	P	15.9507	former smoker	CRC	ddPCR
LB-CRC-30-P-05	LB-CRC-30	w	65	IV		during	NA	Chemo	146	NA	0	NA	NA	NA	0	NA	NA	NA	NA	134	237	NA	NA	NA	232	NA	BRAF	p.V600E	0.02	0.4	0.52	0.5236	0.3632	0.1489	13.2831	7.5	62.0364	0	P	4.28837	former smoker	CRC	ddPCR
LB-CRC-30-P-06	LB-CRC-30	w	65	IV		during	NA	Chemo	176	NA	0	NA	NA	NA	0	NA	NA	NA	NA	134	237	NA	NA	NA	232	NA	BRAF	p.V600E	0.02	0.4	0.52	0.5236	0.3632	0.1489	0.94	3	49.482	0	P	4.85731	former smoker	CRC	ddPCR
LB-CRC-30-P-07	LB-CRC-30	w	65	IV		during	NA	Chemo	204	NA	0	NA	NA	NA	0	NA	NA	NA	NA	134	237	NA	NA	NA	232	NA	BRAF	p.V600E	0.02	0.4	0.52	0.5236	0.3632	0.1489	11.06	7.5	112.819	0	P	6.59004	former smoker	CRC	ddPCR
LB-CRC-30-P-08	LB-CRC-30	w	65	IV		during	NA	Chemo	232	NA	0	NA	NA	NA	0	NA	NA	NA	NA	134	237	NA	NA	NA	232	NA	BRAF	p.V600E	0.02	0.4	0.52	0.5236	0.3632	0.1489	0.607238	3	31.206	0	P	8.28643	former smoker	CRC	ddPCR
LB-CRC-30-T-01	LB-CRC-30	w		IV		NA	NA	Chemo	NA	NA	NA	NA	NA	NA	0	NA	NA	NA	NA	134	237	NA	NA	NA	232	NA	BRAF	p.V600E	0.02	0.4	0.52	0.5236	0.3632	0.1489	18.2318	NA	NA	18.2318	R	NA	former smoker	CRC	ddPCR
LB-CRC-32-P-01	LB-CRC-32	w	73	IV		before	NA	Chemo	0	NA	0	NA	NA	NA	0	NA	NA	NA	NA	NA	NA	NA	NA	NA	NA	NA	BRAF	p.V600E	0.02	0.4	0.52	0.5236	0.3632	0.1489	47.7496	7.5	57.34	0	P	35.3573	non-smoker	CRC	ddPCR
LB-CRC-32-P-02	LB-CRC-32	w	73	IV		during	NA	Chemo	5	NA	0	NA	NA	NA	0	NA	NA	NA	NA	NA	NA	NA	NA	NA	NA	NA	BRAF	p.V600E	0.02	0.4	0.52	0.5236	0.3632	0.1489	42.5546	7.5	47.46	0	P	34.3805	non-smoker	CRC	ddPCR
LB-CRC-32-P-03	LB-CRC-32	w	73	IV		during	NA	Chemo	20	NA	0	NA	NA	NA	0	NA	NA	NA	NA	NA	NA	NA	NA	NA	NA	NA	BRAF	p.V600E	0.02	0.4	0.52	0.5236	0.3632	0.1489	43.6428	7.5	67.31	0.00437426	P	25	non-smoker	CRC	ddPCR
LB-CRC-32-P-04	LB-CRC-32	w	73	IV		during	NA	Chemo	34	NA	0	NA	NA	NA	0	NA	NA	NA	NA	NA	NA	NA	NA	NA	NA	NA	BRAF	p.V600E	0.02	0.4	0.52	0.5236	0.3632	0.1489	12.1899	7.5	16.3	0	P	25	non-smoker	CRC	ddPCR
LB-CRC-32-P-05	LB-CRC-32	w	73	IV		during	NA	Chemo	48	NA	0	NA	NA	NA	0	NA	NA	NA	NA	NA	NA	NA	NA	NA	NA	NA	BRAF	p.V600E	0.02	0.4	0.52	0.5236	0.3632	0.1489	0.033953	3	9.92	0	P	20.834	non-smoker	CRC	ddPCR
LB-CRC-32-P-06	LB-CRC-32	w	73	IV		during	NA	Chemo	62	NA	0	NA	NA	NA	0	NA	NA	NA	NA	NA	NA	NA	NA	NA	NA	NA	BRAF	p.V600E	0.02	0.4	0.52	0.5236	0.3632	0.1489	0	7.5	6.37	NA	P	5.30689	non-smoker	CRC	ddPCR
LB-CRC-32-P-07	LB-CRC-32	w	73	IV		during	NA	Chemo	76	NA	0	NA	NA	NA	0	NA	NA	NA	NA	NA	NA	NA	NA	NA	NA	NA	BRAF	p.V600E	0.02	0.4	0.52	0.5236	0.3632	0.1489	0.018738	7.5	4.12	NA	P	3.30862	non-smoker	CRC	ddPCR
LB-CRC-32-P-08	LB-CRC-32	w	73	IV		during	NA	Chemo	104	NA	0	NA	NA	NA	0	NA	NA	NA	NA	NA	NA	NA	NA	NA	NA	NA	BRAF	p.V600E	0.02	0.4	0.52	0.5236	0.3632	0.1489	0.0235798	7.5	18.4668	0	P	1.86328	non-smoker	CRC	ddPCR
LB-CRC-32-P-09	LB-CRC-32	w	73	IV		during	NA	Chemo	132	NA	0	NA	NA	NA	0	NA	NA	NA	NA	NA	NA	NA	NA	NA	NA	NA	BRAF	p.V600E	0.02	0.4	0.52	0.5236	0.3632	0.1489	0	7.5	13.5696	NA	P	1.2751	non-smoker	CRC	ddPCR
LB-CRC-32-P-10	LB-CRC-32	w	73	IV		during	NA	Chemo	174	NA	0	NA	NA	NA	0	NA	NA	NA	NA	NA	NA	NA	NA	NA	NA	NA	BRAF	p.V600E	0.02	0.4	0.52	0.5236	0.3632	0.1489	0.03	7.5	31.6604	0	P	1.25198	non-smoker	CRC	ddPCR
LB-CRC-32-P-11	LB-CRC-32	w	73	IV		during	NA	Chemo	188	NA	0	NA	NA	NA	0	NA	NA	NA	NA	NA	NA	NA	NA	NA	NA	NA	BRAF	p.V600E	0.02	0.4	0.52	0.5236	0.3632	0.1489	0.0165251	6	18.803	NA	P	1.34773	non-smoker	CRC	ddPCR
LB-CRC-32-P-12	LB-CRC-32	w	73	IV		during	NA	Chemo	195	NA	0	NA	NA	NA	0	NA	NA	NA	NA	NA	NA	NA	NA	NA	NA	NA	BRAF	p.V600E	0.02	0.4	0.52	0.5236	0.3632	0.1489	0.026333	7.5	24.6104	0	P	1.45882	non-smoker	CRC	ddPCR
LB-CRC-32-P-13	LB-CRC-32	w	73	IV		during	NA	Chemo	244	NA	0	NA	NA	NA	0	NA	NA	NA	NA	NA	NA	NA	NA	NA	NA	NA	BRAF	p.V600E	0.02	0.4	0.52	0.5236	0.3632	0.1489	0.0244537	7.5	8.2548	0	P	0.898518	non-smoker	CRC	ddPCR
LB-CRC-32-P-14	LB-CRC-32	w	73	IV		during	NA	Chemo	265	NA	0	NA	NA	NA	0	NA	NA	NA	NA	NA	NA	NA	NA	NA	NA	NA	BRAF	p.V600E	0.02	0.4	0.52	0.5236	0.3632	0.1489	0.102582	7.5	20.5516	0	P	0.870224	non-smoker	CRC	ddPCR
LB-CRC-32-P-15	LB-CRC-32	w	73	IV		during	NA	Chemo	279	NA	0	NA	NA	NA	0	NA	NA	NA	NA	NA	NA	NA	NA	NA	NA	NA	BRAF	p.V600E	0.02	0.4	0.52	0.5236	0.3632	0.1489	0.0232558	7.5	18.9092	0	P	1.08626	non-smoker	CRC	ddPCR
LB-CRC-34-P-01	LB-CRC-34	m	62	IV	NA	before	NA	Chemo	0	NA	0	NA	NA	NA	0	NA	NA	NA	169	NA	NA	NA	NA	NA	NA	NA	NA	NA	NA	NA	NA	NA	NA	NA	NA	7.5	140.923	NA	P	NA	NA	CRC	cfDNA_conc
LB-CRC-35-P-01	LB-CRC-35	m	78	III	NA	before	Surgery	Chemo	0	119	0	146	NA	NA	NA	NA	NA	NA	NA	NA	NA	NA	NA	NA	NA	NA	NA	NA	NA	NA	NA	NA	NA	NA	NA	7.5	7.6956	NA	P	NA	NA	CRC	cfDNA_conc
LB-CRC-36-P-01	LB-CRC-36	w	78	IV	NA	before	Surgery	NA	-1	0	NA	NA	NA	NA	NA	NA	NA	NA	NA	NA	NA	NA	NA	NA	NA	NA	NA	NA	NA	NA	NA	NA	NA	NA	NA	7.5	19.4532	NA	P	NA	NA	CRC	cfDNA_conc
LB-CRC-37-P-01	LB-CRC-37	w	72	II		after	Surgery	NA	-2	0	NA	NA	NA	NA	NA	NA	NA	NA	NA	NA	NA	NA	NA	NA	NA	NA	KRAS	SNVs	0.11	0.26	0.41	0.4627	0.2621	0.1089	0.1	7	3.03814	NA	P	0.557416	non-smoker	CRC	ddPCR
LB-CRC-37-P-02	LB-CRC-37	w	72	II		after	Surgery	NA	6	0	NA	NA	NA	NA	NA	NA	NA	NA	NA	NA	NA	NA	NA	NA	NA	NA	KRAS	SNVs	0.11	0.26	0.41	0.4627	0.2621	0.1089	0	7.5	30.8968	NA	P	0.459649	non-smoker	CRC	ddPCR
LB-CRC-37-P-03	LB-CRC-37	w	72	II		after	Surgery	NA	36	0	NA	NA	NA	NA	NA	NA	NA	NA	NA	NA	NA	NA	NA	NA	NA	NA	KRAS	SNVs	0.11	0.26	0.41	0.4627	0.2621	0.1089	0	4.5	7.72933	NA	P	0.559403	non-smoker	CRC	ddPCR
LB-CRC-37-T-01	LB-CRC-37	w		II		after	Surgery	NA	NA	0	NA	NA	NA	NA	NA	NA	NA	NA	NA	NA	NA	NA	NA	NA	NA	NA	KRAS	p.G12D	0.11	0.26	0.41	0.4627	0.2621	0.1089	43.1874	NA	NA	NA	R	NA	non-smoker	CRC	ddPCR
LB-CRC-38-P-01	LB-CRC-38	m	69	IV	C	after	Surgery	Chemo	-1	0	NA	NA	NA	NA	29	NA	NA	NA	NA	120	NA	NA	NA	NA	NA	NA	BRAF	p.V600E	0.02	0.4	0.52	0.5236	0.3632	0.1489	0.81	7	20.0979	0	P	1.07471	former smoker	CRC	ddPCR
LB-CRC-38-P-02	LB-CRC-38	m	69	IV	C	after	Surgery	Chemo	5	0	NA	NA	NA	NA	29	NA	NA	NA	NA	120	NA	NA	NA	NA	NA	NA	BRAF	p.V600E	0.02	0.4	0.52	0.5236	0.3632	0.1489	2.01	7.5	47.4972	0	P	0.923178	former smoker	CRC	ddPCR
LB-CRC-38-P-03	LB-CRC-38	m	69	IV	C	after	Surgery	Chemo	29	0	NA	NA	NA	NA	29	NA	NA	NA	NA	120	NA	NA	NA	NA	NA	NA	BRAF	p.V600E	0.02	0.4	0.52	0.5236	0.3632	0.1489	0.67	5	49.5522	0	P	1.18992	former smoker	CRC	ddPCR
LB-CRC-38-P-04	LB-CRC-38	m	69	IV	C	after	Surgery	Chemo	85	0	NA	NA	NA	NA	29	NA	NA	NA	NA	120	NA	NA	NA	NA	NA	NA	BRAF	p.V600E	0.02	0.4	0.52	0.5236	0.3632	0.1489	0	7	172.537	NA	P	4.34648	former smoker	CRC	ddPCR
LB-CRC-38-P-05	LB-CRC-38	m	69	IV	C	after	Surgery	Chemo	139	0	NA	NA	NA	NA	29	NA	NA	NA	NA	120	NA	NA	NA	NA	NA	NA	BRAF	p.V600E	0.02	0.4	0.52	0.5236	0.3632	0.1489	0.0115895	4.5	39.1293	NA	P	1.14437	former smoker	CRC	ddPCR
LB-CRC-38-P-06	LB-CRC-38	m	69	IV	C	after	Surgery	Chemo	159	0	NA	NA	NA	NA	29	NA	NA	NA	NA	120	NA	NA	NA	NA	NA	NA	BRAF	p.V600E	0.02	0.4	0.52	0.5236	0.3632	0.1489	0.0239003	7.5	30.2548	0	P	0.828929	former smoker	CRC	ddPCR
LB-CRC-38-P-07	LB-CRC-38	m	69	IV	C	after	Surgery	Chemo	183	0	NA	NA	NA	NA	29	NA	NA	NA	NA	120	NA	NA	NA	NA	NA	NA	BRAF	p.V600E	0.02	0.4	0.52	0.5236	0.3632	0.1489	0.0534474	7	30.2811	0	P	0.760487	former smoker	CRC	ddPCR
LB-CRC-38-T-01	LB-CRC-38	m		IV	C	before	Surgery	Chemo	NA	0	NA	NA	NA	NA	29	NA	NA	NA	NA	120	NA	NA	NA	NA	NA	NA	BRAF	p.V600E	0.02	0.4	0.52	0.5236	0.3632	0.1489	30.5212	NA	NA	NA	R	NA	former smoker	CRC	ddPCR
LB-CRC-40-P-01	LB-CRC-40	m	54	I		before	Surgery	NA	-4	0	NA	NA	NA	NA	NA	NA	NA	NA	NA	NA	NA	NA	NA	NA	NA	NA	KRAS	SNVs	0.11	0.26	0.41	0.4627	0.2621	0.1089	0.0756592	3	3.09	NA	P	0.565362	non-smoker	CRC	ddPCR
LB-CRC-40-P-02	LB-CRC-40	m	54	I		after	Surgery	NA	4	0	NA	NA	NA	NA	NA	NA	NA	NA	NA	NA	NA	NA	NA	NA	NA	NA	KRAS	SNVs	0.11	0.26	0.41	0.4627	0.2621	0.1089	0.0236759	7	33.357	NA	P	0.540963	non-smoker	CRC	ddPCR
LB-CRC-40-T-01	LB-CRC-40	m		I		NA	Surgery	NA	NA	0	NA	NA	NA	NA	NA	NA	NA	NA	NA	NA	NA	NA	NA	NA	NA	NA	KRAS	SNVs	0.11	0.26	0.41	0.4627	0.2621	0.1089	14.5	NA	NA	NA	R	NA	non-smoker	CRC	ddPCR
LB-CRC-41-P-01	LB-CRC-41	m	64	II	A	before	Surgery	NA	-1	0	NA	NA	NA	NA	NA	NA	NA	NA	NA	NA	NA	NA	NA	NA	NA	NA	KRAS	SNVs	0.11	0.26	0.41	0.4627	0.2621	0.1089	1.48127	5.5	11.6264	0.138331	P	0.847061	smoker	CRC	ddPCR
LB-CRC-41-P-02	LB-CRC-41	m	64	II	A	after	Surgery	NA	10	0	NA	NA	NA	NA	NA	NA	NA	NA	NA	NA	NA	NA	NA	NA	NA	NA	KRAS	SNVs	0.11	0.26	0.41	0.4627	0.2621	0.1089	0.0556154	7.5	10.2036	NA	P	0.807631	smoker	CRC	ddPCR
LB-CRC-41-T-01	LB-CRC-41	m		II	A	NA	Surgery	NA	NA	0	NA	NA	NA	NA	NA	NA	NA	NA	NA	NA	NA	NA	NA	NA	NA	NA	KRAS	SNVs	0.11	0.26	0.41	0.4627	0.2621	0.1089	35.73	NA	NA	NA	R	NA	smoker	CRC	ddPCR
LB-CRC-43-P-01	LB-CRC-43	w	69	IV		before	NA	Chemo	0		0	NA	NA	NA	0	NA	NA	NA	NA	NA	NA	NA	NA	NA	NA	NA	KRAS	SNVs	0.11	0.26	0.41	0.4627	0.2621	0.1089	8.98615	4	12.9937	0.0618845	P	0.782508	non-smoker	CRC	ddPCR
LB-CRC-43-P-02	LB-CRC-43	w	69	IV		during	NA	Chemo	26		0	NA	NA	NA	0	NA	NA	NA	NA	NA	NA	NA	NA	NA	NA	NA	KRAS	SNVs	0.11	0.26	0.41	0.4627	0.2621	0.1089	0.0474304	7	10.173	NA	P	1.3127	non-smoker	CRC	ddPCR
LB-CRC-43-P-03	LB-CRC-43	w	69	IV		during	NA	Chemo	55		0	NA	NA	NA	0	NA	NA	NA	NA	NA	NA	NA	NA	NA	NA	NA	KRAS	SNVs	0.11	0.26	0.41	0.4627	0.2621	0.1089	0.0384696	7.5	56.8676	NA	P	0.956706	non-smoker	CRC	ddPCR
LB-CRC-43-P-04	LB-CRC-43	w	69	IV		during	NA	Chemo	96		0	NA	NA	NA	0	NA	NA	NA	NA	NA	NA	NA	NA	NA	NA	NA	KRAS	SNVs	0.11	0.26	0.41	0.4627	0.2621	0.1089	0	6	31.7035	0.0460177	P	0.709552	non-smoker	CRC	ddPCR
LB-CRC-43-P-05	LB-CRC-43	w	69	IV		during	NA	Chemo	110		0	NA	NA	NA	0	NA	NA	NA	NA	NA	NA	NA	NA	NA	NA	NA	KRAS	SNVs	0.11	0.26	0.41	0.4627	0.2621	0.1089	0.0387804	5.5	92.568	NA	P	0.329953	non-smoker	CRC	ddPCR
LB-Neg-01-P-01	LB-Neg-01	m	30	NA		Healthy	NA	NA	NA	NA	NA	NA	NA	NA	NA	NA	NA	NA	NA	NA	NA	NA	NA	NA	NA	NA	BRAF	p.V600E	0.02	0.4	0.52	0.5236	0.3632	0.1489	0	7.5	NA	0	P	NA	NA	Healthy	ddPCR
LB-Neg-02-P-01	LB-Neg-02	m	30	NA		Healthy	NA	NA	NA	NA	NA	NA	NA	NA	NA	NA	NA	NA	NA	NA	NA	NA	NA	NA	NA	NA	KRAS	SNVs	0.11	0.26	0.41	0.4627	0.2621	0.1089	0.07	7.5	NA	0	P	NA	NA	Healthy	ddPCR
LB-Neg-03-P-01	LB-Neg-03	m	52	Healthy	NA	Healthy	NA	NA	NA	NA	NA	NA	NA	NA	NA	NA	NA	NA	NA	NA	NA	NA	NA	NA	NA	NA	NA	NA	NA	NA	NA	NA	NA	NA	NA	6.5	1.88862	NA	P	NA	NA	Healthy	cfDNA_conc
LB-Neg-04-P-01	LB-Neg-04	w	69	Healthy	NA	Healthy	NA	NA	NA	NA	NA	NA	NA	NA	NA	NA	NA	NA	NA	NA	NA	NA	NA	NA	NA	NA	NA	NA	NA	NA	NA	NA	NA	NA	NA	7.5	5.2616	NA	P	NA	NA	Healthy	cfDNA_conc
LB-Neg-05-P-01	LB-Neg-05	m	30	Healthy	NA	Healthy	NA	NA	NA	NA	NA	NA	NA	NA	NA	NA	NA	NA	NA	NA	NA	NA	NA	NA	NA	NA	NA	NA	NA	NA	NA	NA	NA	NA	NA	6.5	4.92415	NA	P	NA	NA	Healthy	cfDNA_conc
LB-Neg-06-P-01	LB-Neg-06	w	40	NA		Healthy	NA	NA	NA	NA	NA	NA	NA	NA	NA	NA	NA	NA	NA	NA	NA	NA	NA	NA	NA	NA	BRAF	p.V600E	0.02	0.4	0.52	0.5236	0.3632	0.1489	0	7.5	NA	0	P	NA	NA	Healthy	ddPCR
LB-Neg-07-P-01	LB-Neg-07	w	52	NA		Healthy	NA	NA	NA	NA	NA	NA	NA	NA	NA	NA	NA	NA	NA	NA	NA	NA	NA	NA	NA	NA	BRAF	p.V600E	0.02	0.4	0.52	0.5236	0.3632	0.1489	0.029	7.5	NA	0	P	NA	NA	Healthy	ddPCR
LB-Neg-08-P-01	LB-Neg-08	w	24	Healthy	NA	Healthy	NA	NA	NA	NA	NA	NA	NA	NA	NA	NA	NA	NA	NA	NA	NA	NA	NA	NA	NA	NA	NA	NA	NA	NA	NA	NA	NA	NA	NA	7.5	1.446	NA	P	NA	NA	Healthy	cfDNA_conc
LB-Neg-09-P-01	LB-Neg-09	w	31	Healthy	NA	Healthy	NA	NA	NA	NA	NA	NA	NA	NA	NA	NA	NA	NA	NA	NA	NA	NA	NA	NA	NA	NA	NA	NA	NA	NA	NA	NA	NA	NA	NA	7.5	1.4872	NA	P	NA	NA	Healthy	cfDNA_conc
LB-Neg-10-P-01	LB-Neg-10	w	29	Healthy	NA	Healthy	NA	NA	NA	NA	NA	NA	NA	NA	NA	NA	NA	NA	NA	NA	NA	NA	NA	NA	NA	NA	NA	NA	NA	NA	NA	NA	NA	NA	NA	7.5	2.44	NA	P	NA	NA	Healthy	cfDNA_conc
LB-Neg-11-P-01	LB-Neg-11	w	51	Healthy	NA	Healthy	NA	NA	NA	NA	NA	NA	NA	NA	NA	NA	NA	NA	NA	NA	NA	NA	NA	NA	NA	NA	NA	NA	NA	NA	NA	NA	NA	NA	NA	7.5	1.172	NA	P	NA	NA	Healthy	cfDNA_conc
LB-Neg-12-P-01	LB-Neg-12	w	55	Healthy	NA	Healthy	NA	NA	NA	NA	NA	NA	NA	NA	NA	NA	NA	NA	NA	NA	NA	NA	NA	NA	NA	NA	NA	NA	NA	NA	NA	NA	NA	NA	NA	7.5	0.8412	NA	P	NA	NA	Healthy	cfDNA_conc
LB-Neg-13-P-01	LB-Neg-13	m	53	NA		Healthy	NA	NA	NA	NA	NA	NA	NA	NA	NA	NA	NA	NA	NA	NA	NA	NA	NA	NA	NA	NA	BRAF	p.V600E	0.02	0.4	0.52	0.5236	0.3632	0.1489	0	7.5	NA	0	P	NA	NA	Healthy	ddPCR
LB-Neg-14-P-01	LB-Neg-14	w	50	Healthy	NA	Healthy	NA	NA	NA	NA	NA	NA	NA	NA	NA	NA	NA	NA	NA	NA	NA	NA	NA	NA	NA	NA	NA	NA	NA	NA	NA	NA	NA	NA	NA	7.5	1.5232	NA	P	NA	NA	Healthy	cfDNA_conc
LB-Neg-15-P-01	LB-Neg-15	w	32	Healthy	NA	Healthy	NA	NA	NA	NA	NA	NA	NA	NA	NA	NA	NA	NA	NA	NA	NA	NA	NA	NA	NA	NA	NA	NA	NA	NA	NA	NA	NA	NA	NA	7.5	2.3064	NA	P	NA	NA	Healthy	cfDNA_conc
LB-Neg-16-P-01	LB-Neg-16	m	39	Healthy	NA	Healthy	NA	NA	NA	NA	NA	NA	NA	NA	NA	NA	NA	NA	NA	NA	NA	NA	NA	NA	NA	NA	NA	NA	NA	NA	NA	NA	NA	NA	NA	6	0.9085	NA	P	NA	NA	Healthy	cfDNA_conc
LB-Neg-17-P-01	LB-Neg-17	m	24	Healthy	NA	Healthy	NA	NA	NA	NA	NA	NA	NA	NA	NA	NA	NA	NA	NA	NA	NA	NA	NA	NA	NA	NA	NA	NA	NA	NA	NA	NA	NA	NA	NA	6.5	8.70877	NA	P	NA	NA	Healthy	cfDNA_conc
LB-Neg-18-P-01	LB-Neg-18	w	25	Healthy	NA	Healthy	NA	NA	NA	NA	NA	NA	NA	NA	NA	NA	NA	NA	NA	NA	NA	NA	NA	NA	NA	NA	NA	NA	NA	NA	NA	NA	NA	NA	NA	7.5	2.074	NA	P	NA	NA	Healthy	cfDNA_conc
LB-Neg-19-P-01	LB-Neg-19	w	42	Healthy	NA	Healthy	NA	NA	NA	NA	NA	NA	NA	NA	NA	NA	NA	NA	NA	NA	NA	NA	NA	NA	NA	NA	NA	NA	NA	NA	NA	NA	NA	NA	NA	7.5	2.534	NA	P	NA	NA	Healthy	cfDNA_conc
LB-Neg-20-P-01	LB-Neg-20	m	46	Healthy	NA	Healthy	NA	NA	NA	NA	NA	NA	NA	NA	NA	NA	NA	NA	NA	NA	NA	NA	NA	NA	NA	NA	NA	NA	NA	NA	NA	NA	NA	NA	NA	6.5	3.02954	NA	P	NA	NA	Healthy	cfDNA_conc
LB-Neg-21-P-01	LB-Neg-21	w	21	Healthy	NA	Healthy	NA	NA	NA	NA	NA	NA	NA	NA	NA	NA	NA	NA	NA	NA	NA	NA	NA	NA	NA	NA	NA	NA	NA	NA	NA	NA	NA	NA	NA	7.5	2.37	NA	P	NA	NA	Healthy	cfDNA_conc
LB-Neg-22-P-01	LB-Neg-22	m	36	NA		Healthy	NA	NA	NA	NA	NA	NA	NA	NA	NA	NA	NA	NA	NA	NA	NA	NA	NA	NA	NA	NA	KRAS	SNVs	0.11	0.26	0.41	0.4627	0.2621	0.1089	0.06	7.5	NA	0.05	P	NA	NA	Healthy	ddPCR
LB-Neg-23-P-01	LB-Neg-23	m	48	Healthy	NA	Healthy	NA	NA	NA	NA	NA	NA	NA	NA	NA	NA	NA	NA	NA	NA	NA	NA	NA	NA	NA	NA	NA	NA	NA	NA	NA	NA	NA	NA	NA	7.5	3.3208	NA	P	NA	NA	Healthy	cfDNA_conc
LB-Neg-24-P-01	LB-Neg-24	m	25	NA		Healthy	NA	NA	NA	NA	NA	NA	NA	NA	NA	NA	NA	NA	NA	NA	NA	NA	NA	NA	NA	NA	BRAF	p.V600E	0.02	0.4	0.52	0.5236	0.3632	0.1489	0	7.5	NA	0	P	NA	NA	Healthy	ddPCR
LB-Neg-25-P-01	LB-Neg-25	w	26	NA		Healthy	NA	NA	NA	NA	NA	NA	NA	NA	NA	NA	NA	NA	NA	NA	NA	NA	NA	NA	NA	NA	KRAS	SNVs	0.11	0.26	0.41	0.4627	0.2621	0.1089	0.11	7.5	NA	0.029	P	NA	NA	Healthy	ddPCR
LB-Neg-26-P-01	LB-Neg-26	w	44	NA		Healthy	NA	NA	NA	NA	NA	NA	NA	NA	NA	NA	NA	NA	NA	NA	NA	NA	NA	NA	NA	NA	BRAF	p.V600E	0.02	0.4	0.52	0.5236	0.3632	0.1489	0	7.5	NA	0	P	NA	NA	Healthy	ddPCR
LB-Neg-27-P-01	LB-Neg-27	w	19	NA		Healthy	NA	NA	NA	NA	NA	NA	NA	NA	NA	NA	NA	NA	NA	NA	NA	NA	NA	NA	NA	NA	BRAF	p.V600E	0.02	0.4	0.52	0.5236	0.3632	0.1489	0	7.5	NA	0.01	P	NA	NA	Healthy	ddPCR
LB-Neg-28-P-01	LB-Neg-28	w	54	Healthy	NA	Healthy	NA	NA	NA	NA	NA	NA	NA	NA	NA	NA	NA	NA	NA	NA	NA	NA	NA	NA	NA	NA	NA	NA	NA	NA	NA	NA	NA	NA	NA	7.5	3.668	NA	P	NA	NA	Healthy	cfDNA_conc
LB-Neg-30-P-01	LB-Neg-30	w	23	NA		Healthy	NA	NA	NA	NA	NA	NA	NA	NA	NA	NA	NA	NA	NA	NA	NA	NA	NA	NA	NA	NA	KRAS	SNVs	0.11	0.26	0.41	0.4627	0.2621	0.1089	0.08	7.5	NA	0.032	P	NA	NA	Healthy	ddPCR
LB-Neg-31-P-01	LB-Neg-31	m	32	Healthy	NA	Healthy	NA	NA	NA	NA	NA	NA	NA	NA	NA	NA	NA	NA	NA	NA	NA	NA	NA	NA	NA	NA	NA	NA	NA	NA	NA	NA	NA	NA	NA	6.5	0.664154	NA	P	NA	NA	Healthy	cfDNA_conc
LB-Neg-33-P-01	LB-Neg-33	w	41	NA		Healthy	NA	NA	NA	NA	NA	NA	NA	NA	NA	NA	NA	NA	NA	NA	NA	NA	NA	NA	NA	NA	KRAS	SNVs	0.11	0.26	0.41	0.4627	0.2621	0.1089	0.05	7.5	NA	0.04	P	NA	NA	Healthy	ddPCR
LB-Neg-34-P-01	LB-Neg-34	w	23	Healthy	NA	Healthy	NA	NA	NA	NA	NA	NA	NA	NA	NA	NA	NA	NA	NA	NA	NA	NA	NA	NA	NA	NA	NA	NA	NA	NA	NA	NA	NA	NA	NA	7.5	1.9104	NA	P	NA	NA	Healthy	cfDNA_conc
LB-Neg-35-P-01	LB-Neg-35	w	49	NA		Healthy	NA	NA	NA	NA	NA	NA	NA	NA	NA	NA	NA	NA	NA	NA	NA	NA	NA	NA	NA	NA	KRAS	SNVs	0.11	0.26	0.41	0.4627	0.2621	0.1089	0	7.5	NA	0.0564781	P	NA	NA	Healthy	ddPCR
LB-Neg-36-P-01	LB-Neg-36	w	27	NA		Healthy	NA	NA	NA	NA	NA	NA	NA	NA	NA	NA	NA	NA	NA	NA	NA	NA	NA	NA	NA	NA	BRAF	p.V600E	0.02	0.4	0.52	0.5236	0.3632	0.1489	0	7.5	NA	0	P	NA	NA	Healthy	ddPCR
LB-Neg-37-P-01	LB-Neg-37	m	60	Healthy	NA	Healthy	NA	NA	NA	NA	NA	NA	NA	NA	NA	NA	NA	NA	NA	NA	NA	NA	NA	NA	NA	NA	NA	NA	NA	NA	NA	NA	NA	NA	NA	7.5	4.5464	NA	P	NA	NA	Healthy	cfDNA_conc
LB-Neg-38-P-01	LB-Neg-38	m	20	Healthy	NA	Healthy	NA	NA	NA	NA	NA	NA	NA	NA	NA	NA	NA	NA	NA	NA	NA	NA	NA	NA	NA	NA	NA	NA	NA	NA	NA	NA	NA	NA	NA	7.5	1.7476	NA	P	NA	NA	Healthy	cfDNA_conc
LB-Neg-39-P-01	LB-Neg-39	m	30	Healthy	NA	Healthy	NA	NA	NA	NA	NA	NA	NA	NA	NA	NA	NA	NA	NA	NA	NA	NA	NA	NA	NA	NA	NA	NA	NA	NA	NA	NA	NA	NA	NA	7	12.6043	NA	P	NA	NA	Healthy	cfDNA_conc
LB-Neg-40-P-01	LB-Neg-40	w	49	Healthy	NA	Healthy	NA	NA	NA	NA	NA	NA	NA	NA	NA	NA	NA	NA	NA	NA	NA	NA	NA	NA	NA	NA	NA	NA	NA	NA	NA	NA	NA	NA	NA	7.5	2.5496	NA	P	NA	NA	Healthy	cfDNA_conc
LB-Neg-41-P-01	LB-Neg-41	w	21	Healthy	NA	Healthy	NA	NA	NA	NA	NA	NA	NA	NA	NA	NA	NA	NA	NA	NA	NA	NA	NA	NA	NA	NA	NA	NA	NA	NA	NA	NA	NA	NA	NA	7.5	3.4196	NA	P	NA	NA	Healthy	cfDNA_conc
LB-Neg-42-P-01	LB-Neg-42	w	33	NA		Healthy	NA	NA	NA	NA	NA	NA	NA	NA	NA	NA	NA	NA	NA	NA	NA	NA	NA	NA	NA	NA	BRAF	p.V600E	0.02	0.4	0.52	0.5236	0.3632	0.1489	0	7.5	NA	0	P	NA	NA	Healthy	ddPCR
LB-Neg-43-P-01	LB-Neg-43	w	31	NA		Healthy	NA	NA	NA	NA	NA	NA	NA	NA	NA	NA	NA	NA	NA	NA	NA	NA	NA	NA	NA	NA	KRAS	SNVs	0.11	0.26	0.41	0.4627	0.2621	0.1089	0	7.5	NA	0.033	P	NA	NA	Healthy	ddPCR
LB-Neg-44-P-01	LB-Neg-44	w	38	NA		Healthy	NA	NA	NA	NA	NA	NA	NA	NA	NA	NA	NA	NA	NA	NA	NA	NA	NA	NA	NA	NA	BRAF	p.V600E	0.02	0.4	0.52	0.5236	0.3632	0.1489	0	7.5	NA	0	P	NA	NA	Healthy	ddPCR
LB-Neg-45-P-01	LB-Neg-45	m	26	Healthy	NA	Healthy	NA	NA	NA	NA	NA	NA	NA	NA	NA	NA	NA	NA	NA	NA	NA	NA	NA	NA	NA	NA	NA	NA	NA	NA	NA	NA	NA	NA	NA	7	2.30271	NA	P	NA	NA	Healthy	cfDNA_conc
LB-Neg-46-P-01	LB-Neg-46	m	24	Healthy	NA	Healthy	NA	NA	NA	NA	NA	NA	NA	NA	NA	NA	NA	NA	NA	NA	NA	NA	NA	NA	NA	NA	NA	NA	NA	NA	NA	NA	NA	NA	NA	6	2.7615	NA	P	NA	NA	Healthy	cfDNA_conc
LB-Neg-47-P-01	LB-Neg-47	m	46	Healthy	NA	Healthy	NA	NA	NA	NA	NA	NA	NA	NA	NA	NA	NA	NA	NA	NA	NA	NA	NA	NA	NA	NA	NA	NA	NA	NA	NA	NA	NA	NA	NA	7.5	3.1504	NA	P	NA	NA	Healthy	cfDNA_conc
LB-Neg-48-P-01	LB-Neg-48	m	41	Healthy	NA	Healthy	NA	NA	NA	NA	NA	NA	NA	NA	NA	NA	NA	NA	NA	NA	NA	NA	NA	NA	NA	NA	NA	NA	NA	NA	NA	NA	NA	NA	NA	7.5	5.642	NA	P	NA	NA	Healthy	cfDNA_conc
LB-Neg-49-P-01	LB-Neg-49	w	26	NA		Healthy	NA	NA	NA	NA	NA	NA	NA	NA	NA	NA	NA	NA	NA	NA	NA	NA	NA	NA	NA	NA	KRAS	SNVs	0.11	0.26	0.41	0.4627	0.2621	0.1089	0	7.5	NA	0	P	NA	NA	Healthy	ddPCR
LB-Neg-50-P-01	LB-Neg-50	m	28	Healthy	NA	Healthy	NA	NA	NA	NA	NA	NA	NA	NA	NA	NA	NA	NA	NA	NA	NA	NA	NA	NA	NA	NA	NA	NA	NA	NA	NA	NA	NA	NA	NA	3.5	1.99114	NA	P	NA	NA	Healthy	cfDNA_conc
LB-Neg-51-P-01	LB-Neg-51	w	27	Healthy	NA	Healthy	NA	NA	NA	NA	NA	NA	NA	NA	NA	NA	NA	NA	NA	NA	NA	NA	NA	NA	NA	NA	NA	NA	NA	NA	NA	NA	NA	NA	NA	7.5	2.5892	NA	P	NA	NA	Healthy	cfDNA_conc
LB-Neg-52-P-01	LB-Neg-52	m	31	Healthy	NA	Healthy	NA	NA	NA	NA	NA	NA	NA	NA	NA	NA	NA	NA	NA	NA	NA	NA	NA	NA	NA	NA	NA	NA	NA	NA	NA	NA	NA	NA	NA	6	2.6435	NA	P	NA	NA	Healthy	cfDNA_conc
LB-Neg-53-P-01	LB-Neg-53	w	25	Healthy	NA	Healthy	NA	NA	NA	NA	NA	NA	NA	NA	NA	NA	NA	NA	NA	NA	NA	NA	NA	NA	NA	NA	NA	NA	NA	NA	NA	NA	NA	NA	NA	7.5	2.7648	NA	P	NA	NA	Healthy	cfDNA_conc
LB-Neg-54-P-01	LB-Neg-54	m	31	Healthy	NA	Healthy	NA	NA	NA	NA	NA	NA	NA	NA	NA	NA	NA	NA	NA	NA	NA	NA	NA	NA	NA	NA	NA	NA	NA	NA	NA	NA	NA	NA	NA	7	3.08957	NA	P	NA	NA	Healthy	cfDNA_conc
LB-Neg-56-P-01	LB-Neg-56	w	43	Healthy	NA	Healthy	NA	NA	NA	NA	NA	NA	NA	NA	NA	NA	NA	NA	NA	NA	NA	NA	NA	NA	NA	NA	NA	NA	NA	NA	NA	NA	NA	NA	NA	7.5	2.7968	NA	P	NA	NA	Healthy	cfDNA_conc
LB-Neg-57-P-01	LB-Neg-57	w	23	Healthy	NA	Healthy	NA	NA	NA	NA	NA	NA	NA	NA	NA	NA	NA	NA	NA	NA	NA	NA	NA	NA	NA	NA	NA	NA	NA	NA	NA	NA	NA	NA	NA	7.5	1.678	NA	P	NA	NA	Healthy	cfDNA_conc
LB-Neg-58-P-01	LB-Neg-58	w	28	Healthy	NA	Healthy	NA	NA	NA	NA	NA	NA	NA	NA	NA	NA	NA	NA	NA	NA	NA	NA	NA	NA	NA	NA	NA	NA	NA	NA	NA	NA	NA	NA	NA	7.5	0.982	NA	P	NA	NA	Healthy	cfDNA_conc
LB-Neg-59-P-01	LB-Neg-59	w	24	Healthy	NA	Healthy	NA	NA	NA	NA	NA	NA	NA	NA	NA	NA	NA	NA	NA	NA	NA	NA	NA	NA	NA	NA	NA	NA	NA	NA	NA	NA	NA	NA	NA	7.5	3.074	NA	P	NA	NA	Healthy	cfDNA_conc
LB-Neg-60-P-01	LB-Neg-60	w	30	Healthy	NA	Healthy	NA	NA	NA	NA	NA	NA	NA	NA	NA	NA	NA	NA	NA	NA	NA	NA	NA	NA	NA	NA	NA	NA	NA	NA	NA	NA	NA	NA	NA	7.5	1.2488	NA	P	NA	NA	Healthy	cfDNA_conc
LB-Neg-61-P-01	LB-Neg-61	m	37	Healthy	NA	Healthy	NA	NA	NA	NA	NA	NA	NA	NA	NA	NA	NA	NA	NA	NA	NA	NA	NA	NA	NA	NA	NA	NA	NA	NA	NA	NA	NA	NA	NA	7.5	2.1172	NA	P	NA	NA	Healthy	cfDNA_conc
LB-Neg-62-P-01	LB-Neg-62	m	33	Healthy	NA	Healthy	NA	NA	NA	NA	NA	NA	NA	NA	NA	NA	NA	NA	NA	NA	NA	NA	NA	NA	NA	NA	NA	NA	NA	NA	NA	NA	NA	NA	NA	7.5	5.1712	NA	P	NA	NA	Healthy	cfDNA_conc
LB-Neg-63-P-01	LB-Neg-63	m	44	Healthy	NA	Healthy	NA	NA	NA	NA	NA	NA	NA	NA	NA	NA	NA	NA	NA	NA	NA	NA	NA	NA	NA	NA	NA	NA	NA	NA	NA	NA	NA	NA	NA	7.5	2.8164	NA	P	NA	NA	Healthy	cfDNA_conc
LB-Neg-64-P-01	LB-Neg-64	w	72	Healthy	NA	Healthy	NA	NA	NA	NA	NA	NA	NA	NA	NA	NA	NA	NA	NA	NA	NA	NA	NA	NA	NA	NA	NA	NA	NA	NA	NA	NA	NA	NA	NA	7.5	2.3916	NA	P	NA	NA	Healthy	cfDNA_conc
LB-Neg-65-P-01	LB-Neg-65	m	73	Healthy	NA	Healthy	NA	NA	NA	NA	NA	NA	NA	NA	NA	NA	NA	NA	NA	NA	NA	NA	NA	NA	NA	NA	NA	NA	NA	NA	NA	NA	NA	NA	NA	7.5	3.04	NA	P	NA	NA	Healthy	cfDNA_conc
LB-Neg-67-P-01	LB-Neg-67	w	39	Healthy	NA	Healthy	NA	NA	NA	NA	NA	NA	NA	NA	NA	NA	NA	NA	NA	NA	NA	NA	NA	NA	NA	NA	NA	NA	NA	NA	NA	NA	NA	NA	NA	7.5	2.1512	NA	P	NA	NA	Healthy	cfDNA_conc
LB-Neg-68-P-01	LB-Neg-68	w	40	Healthy	NA	Healthy	NA	NA	NA	NA	NA	NA	NA	NA	NA	NA	NA	NA	NA	NA	NA	NA	NA	NA	NA	NA	NA	NA	NA	NA	NA	NA	NA	NA	NA	7.5	1.924	NA	P	NA	NA	Healthy	cfDNA_conc
LB-Neg-69-P-01	LB-Neg-69	m	56	Healthy	NA	Healthy	NA	NA	NA	NA	NA	NA	NA	NA	NA	NA	NA	NA	NA	NA	NA	NA	NA	NA	NA	NA	NA	NA	NA	NA	NA	NA	NA	NA	NA	6.5	3.41354	NA	P	NA	NA	Healthy	cfDNA_conc
LB-Neg-70-P-01	LB-Neg-70	m	26	Healthy	NA	Healthy	NA	NA	NA	NA	NA	NA	NA	NA	NA	NA	NA	NA	NA	NA	NA	NA	NA	NA	NA	NA	NA	NA	NA	NA	NA	NA	NA	NA	NA	6.5	1.28815	NA	P	NA	NA	Healthy	cfDNA_conc
LB-Neg-71-P-01	LB-Neg-71	w	36	Healthy	NA	Healthy	NA	NA	NA	NA	NA	NA	NA	NA	NA	NA	NA	NA	NA	NA	NA	NA	NA	NA	NA	NA	NA	NA	NA	NA	NA	NA	NA	NA	NA	7.5	1.5188	NA	P	NA	NA	Healthy	cfDNA_conc
LB-Neg-72-P-01	LB-Neg-72	m	30	Healthy	NA	Healthy	NA	NA	NA	NA	NA	NA	NA	NA	NA	NA	NA	NA	NA	NA	NA	NA	NA	NA	NA	NA	NA	NA	NA	NA	NA	NA	NA	NA	NA	7	2.46214	NA	P	NA	NA	Healthy	cfDNA_conc
LB-Neg-73-P-01	LB-Neg-73	m	38	Healthy	NA	Healthy	NA	NA	NA	NA	NA	NA	NA	NA	NA	NA	NA	NA	NA	NA	NA	NA	NA	NA	NA	NA	NA	NA	NA	NA	NA	NA	NA	NA	NA	7.5	3.0356	NA	P	NA	NA	Healthy	cfDNA_conc
LB-Neg-74-P-01	LB-Neg-74	m	29	Healthy	NA	Healthy	NA	NA	NA	NA	NA	NA	NA	NA	NA	NA	NA	NA	NA	NA	NA	NA	NA	NA	NA	NA	NA	NA	NA	NA	NA	NA	NA	NA	NA	7	2.4	NA	P	NA	NA	Healthy	cfDNA_conc
LB-Neg-75-P-01	LB-Neg-75	m	25	Healthy	NA	Healthy	NA	NA	NA	NA	NA	NA	NA	NA	NA	NA	NA	NA	NA	NA	NA	NA	NA	NA	NA	NA	NA	NA	NA	NA	NA	NA	NA	NA	NA	7	4.215	NA	P	NA	NA	Healthy	cfDNA_conc
LB-Neg-76-P-01	LB-Neg-76	w	27	Healthy	NA	Healthy	NA	NA	NA	NA	NA	NA	NA	NA	NA	NA	NA	NA	NA	NA	NA	NA	NA	NA	NA	NA	NA	NA	NA	NA	NA	NA	NA	NA	NA	7.5	1.3236	NA	P	NA	NA	Healthy	cfDNA_conc
LB-Neg-77-P-01	LB-Neg-77	w	24	Healthy	NA	Healthy	NA	NA	NA	NA	NA	NA	NA	NA	NA	NA	NA	NA	NA	NA	NA	NA	NA	NA	NA	NA	NA	NA	NA	NA	NA	NA	NA	NA	NA	7.5	1.004	NA	P	NA	NA	Healthy	cfDNA_conc
LB-Neg-78-P-01	LB-Neg-78	m	24	Healthy	NA	Healthy	NA	NA	NA	NA	NA	NA	NA	NA	NA	NA	NA	NA	NA	NA	NA	NA	NA	NA	NA	NA	NA	NA	NA	NA	NA	NA	NA	NA	NA	7.5	2.6276	NA	P	NA	NA	Healthy	cfDNA_conc
LB-Neg-79-P-01	LB-Neg-79	w	22	Healthy	NA	Healthy	NA	NA	NA	NA	NA	NA	NA	NA	NA	NA	NA	NA	NA	NA	NA	NA	NA	NA	NA	NA	NA	NA	NA	NA	NA	NA	NA	NA	NA	6.5	2.42308	NA	P	NA	NA	Healthy	cfDNA_conc
LB-Neg-80-P-01	LB-Neg-80	m	22	Healthy	NA	Healthy	NA	NA	NA	NA	NA	NA	NA	NA	NA	NA	NA	NA	NA	NA	NA	NA	NA	NA	NA	NA	NA	NA	NA	NA	NA	NA	NA	NA	NA	7.5	3.7808	NA	P	NA	NA	Healthy	cfDNA_conc
LB-Neg-81-P-01	LB-Neg-81	m	42	Healthy	NA	Healthy	NA	NA	NA	NA	NA	NA	NA	NA	NA	NA	NA	NA	NA	NA	NA	NA	NA	NA	NA	NA	NA	NA	NA	NA	NA	NA	NA	NA	NA	7.5	5.4752	NA	P	NA	NA	Healthy	cfDNA_conc
LB-Neg-82-P-01	LB-Neg-82	w	30	Healthy	NA	Healthy	NA	NA	NA	NA	NA	NA	NA	NA	NA	NA	NA	NA	NA	NA	NA	NA	NA	NA	NA	NA	NA	NA	NA	NA	NA	NA	NA	NA	NA	7.5	1.3408	NA	P	NA	NA	Healthy	cfDNA_conc

## Sheet: Supplementary Table 3
Supplementary Table 3: Data used for the determination of the cutoff for elevated cfDNA concentrations
Measurement-No.	Sample-ID	Disease	cfDNA-conc. (ng/ml)	Material
1	LB-Neg-03-P-01	Healthy	1.88862	Plasma
2	LB-Neg-04-P-01	Healthy	5.2616	Plasma
3	LB-Neg-05-P-01	Healthy	4.92415	Plasma
4	LB-Neg-08-P-01	Healthy	1.446	Plasma
5	LB-Neg-09-P-01	Healthy	1.4872	Plasma
6	LB-Neg-10-P-01	Healthy	2.44	Plasma
7	LB-Neg-11-P-01	Healthy	1.172	Plasma
8	LB-Neg-12-P-01	Healthy	0.8412	Plasma
9	LB-Neg-14-P-01	Healthy	1.5232	Plasma
10	LB-Neg-15-P-01	Healthy	2.3064	Plasma
11	LB-Neg-16-P-01	Healthy	0.9085	Plasma
12	LB-Neg-17-P-01	Healthy	8.70877	Plasma
13	LB-Neg-18-P-01	Healthy	2.074	Plasma
14	LB-Neg-19-P-01	Healthy	2.534	Plasma
15	LB-Neg-20-P-01	Healthy	3.02954	Plasma
16	LB-Neg-21-P-01	Healthy	2.37	Plasma
17	LB-Neg-23-P-01	Healthy	3.3208	Plasma
18	LB-Neg-28-P-01	Healthy	3.668	Plasma
19	LB-Neg-31-P-01	Healthy	0.664154	Plasma
20	LB-Neg-34-P-01	Healthy	1.9104	Plasma
21	LB-Neg-37-P-01	Healthy	4.5464	Plasma
22	LB-Neg-38-P-01	Healthy	1.7476	Plasma
23	LB-Neg-39-P-01	Healthy	12.6043	Plasma
24	LB-Neg-40-P-01	Healthy	2.5496	Plasma
25	LB-Neg-41-P-01	Healthy	3.4196	Plasma
26	LB-Neg-45-P-01	Healthy	2.30271	Plasma
27	LB-Neg-46-P-01	Healthy	2.7615	Plasma
28	LB-Neg-47-P-01	Healthy	3.1504	Plasma
29	LB-Neg-48-P-01	Healthy	5.642	Plasma
30	LB-Neg-50-P-01	Healthy	1.99114	Plasma
31	LB-Neg-51-P-01	Healthy	2.5892	Plasma
32	LB-Neg-52-P-01	Healthy	2.6435	Plasma
33	LB-Neg-53-P-01	Healthy	2.7648	Plasma
34	LB-Neg-54-P-01	Healthy	3.08957	Plasma
35	LB-Neg-56-P-01	Healthy	2.7968	Plasma
36	LB-Neg-57-P-01	Healthy	1.678	Plasma
37	LB-Neg-58-P-01	Healthy	0.982	Plasma
38	LB-Neg-59-P-01	Healthy	3.074	Plasma
39	LB-Neg-60-P-01	Healthy	1.2488	Plasma
40	LB-Neg-61-P-01	Healthy	2.1172	Plasma
41	LB-Neg-62-P-01	Healthy	5.1712	Plasma
42	LB-Neg-63-P-01	Healthy	2.8164	Plasma
43	LB-Neg-64-P-01	Healthy	2.3916	Plasma
44	LB-Neg-65-P-01	Healthy	3.04	Plasma
45	LB-Neg-67-P-01	Healthy	2.1512	Plasma
46	LB-Neg-68-P-01	Healthy	1.924	Plasma
47	LB-Neg-69-P-01	Healthy	3.41354	Plasma
48	LB-Neg-70-P-01	Healthy	1.28815	Plasma
49	LB-Neg-71-P-01	Healthy	1.5188	Plasma
50	LB-Neg-72-P-01	Healthy	2.46214	Plasma
51	LB-Neg-73-P-01	Healthy	3.0356	Plasma
52	LB-Neg-74-P-01	Healthy	2.4	Plasma
53	LB-Neg-75-P-01	Healthy	4.215	Plasma
54	LB-Neg-76-P-01	Healthy	1.3236	Plasma
55	LB-Neg-77-P-01	Healthy	1.004	Plasma
56	LB-Neg-78-P-01	Healthy	2.6276	Plasma
57	LB-Neg-79-P-01	Healthy	2.42308	Plasma
58	LB-Neg-80-P-01	Healthy	3.7808	Plasma
59	LB-Neg-81-P-01	Healthy	5.4752	Plasma
60	LB-Neg-82-P-01	Healthy	1.3408	Plasma
